# Supplementary material for: Coevolution of ribosomal RNA expansion segment 7L and assembly factor Noc2p specializes the ribosome biogenesis pathway between Saccharomyces cerevisiae and Candida albicans
Source: Oxford University Press journal article supplement (doi:10.1093/nar/gkab218), 2021-03-20
Supplement: gkab218_supplemental_files.zip [file gkab218_supplemental_files.zip]

Archive with 2 entries (2 files):
- SUPPLEMENTARY FIGURES.pdf
- SUPPLEMENTARY TABLES.xlsx
