# Supplementary material for: Coevolution of ribosomal RNA expansion segment 7L and assembly factor Noc2p specializes the ribosome biogenesis pathway between Saccharomyces cerevisiae and Candida albicans
Source: Oxford University Press journal article supplement (doi:10.1093/nar/gkab218), 2021-03-20
Supplement: gkab218_supplemental_files.zip [file gkab218_supplemental_files.zip › SUPPLEMENTARY TABLES.xlsx]

## Sheet: Table S1
Systematic Name	Name	Mating type	Genotype
BY4741		a	his3Δ1 leu2Δ0 met15Δ0 ura3Δ0
WXY57	GAL::nop15	a	his3Δ1 leu2Δ0 met15Δ0 ura3Δ0 nop15Δ::LEU2, pZY1
WXY58	GAL::rpl4	a	his3Δ1 leu2Δ0 met15Δ0 ura3Δ0 rpl4aΔ::LEU2,rpl4bΔ::HIS3,pGH208
WXY59	GAL::rcl1	a	his3Δ1 leu2Δ0 met15Δ0 ura3Δ0 rcl1Δ::LEU2, pZY2
WXY60	GAL::rat1	a	his3Δ1 leu2Δ0 met15Δ0 ura3Δ0 rat1Δ::LEU2, pZY3
ZHY32	pGal-rDNA assay strain	a	leu2∆0 lys2-L864UAG ura3∆0 nop10-EGFP::kanMX pGal7-rDNA
ZHY320	S.c-25S or pRDN-wt-U	a	leu2∆0 lys2-L864UAG ura3∆0 rdnΔ nop10-EGFP::kanMX pSc.25S	leu2∆0 lys2-L864UAG ura3∆0 rdnΔ NOP10-EGFP::kanMX pSc.25S	leu2∆0 lys2-L864UAG ura3∆0 rdnΔ NOP10-EGFP::kanMX pSc.25S
ZHY321	C.a-25S	a	leu2∆0 lys2-L864UAG ura3∆0 rdnΔ nop10-EGFP::kanMX pCa.25S	leu2∆0 lys2-L864UAG ura3∆0 rdnΔ NOP10-EGFP::kanMX pCa.25S	leu2∆0 lys2-L864UAG ura3∆0 rdnΔ NOP10-EGFP::kanMX pCa.25S
ZHY322	C.g-25S	a	leu2∆0 lys2-L864UAG ura3∆0 rdnΔ nop10-EGFP::kanMX pCg.25S	leu2∆0 lys2-L864UAG ura3∆0 rdnΔ NOP10-EGFP::kanMX pCg.25S	leu2∆0 lys2-L864UAG ura3∆0 rdnΔ NOP10-EGFP::kanMX pCg.25S
ZHY323	K.l-25S	a	leu2∆0 lys2-L864UAG ura3∆0 rdnΔ nop10-EGFP::kanMX pK.l.25S	leu2∆0 lys2-L864UAG ura3∆0 rdnΔ NOP10-EGFP::kanMX pK.l.25S	leu2∆0 lys2-L864UAG ura3∆0 rdnΔ NOP10-EGFP::kanMX pK.l.25S
ZHY324	C.a-ES7L	a	leu2∆0 lys2-L864UAG ura3∆0 rdnΔ nop10-EGFP::kanMX pCa.ES7L	leu2∆0 lys2-L864UAG ura3∆0 rdnΔ NOP10-EGFP::kanMX pCa.ES7L	leu2∆0 lys2-L864UAG ura3∆0 rdnΔ NOP10-EGFP::kanMX pCa.ES7L
WXY61	S.c-25S-Noc2p	a	leu2∆0 lys2-L864UAG ura3∆0 nop10-EGFP::kanMX rdnΔ,noc2Δ::NatMX, pGH225, pGH587
WXY62	C.a-25S-Noc2p	a	leu2∆0 lys2-L864UAG ura3∆0 nop10-EGFP::kanMX rdnΔ,noc2Δ::NatMX, pGH229, pGH587
WXY63	C.a-25S-Noc2p K384R	a	leu2∆0 lys2-L864UAG ura3∆0 nop10-EGFP::kanMX rdnΔ,noc2Δ::NatMX, pGH229, pGH528
WXY64	C.a-25S-C.a Noc2p	a	leu2∆0 lys2-L864UAG ura3∆0 nop10-EGFP::kanMX rdnΔ,noc2Δ::NatMX, pGH229, pGH583
WXY65	C.a-ES7L-Noc2p	a	leu2∆0 lys2-L864UAG ura3∆0 nop10-EGFP::kanMX rdnΔ,noc2Δ::NatMX, pGH234, pGH587
WXY66	C.a-ES7L-Noc2p K384R	a	leu2∆0 lys2-L864UAG ura3∆0 nop10-EGFP::kanMX rdnΔ,noc2Δ::NatMX, pGH234, pGH528
WXY67	C.a-ES7L-C.a Noc2p	a	leu2∆0 lys2-L864UAG ura3∆0 nop10-EGFP::kanMX rdnΔ,noc2Δ::NatMX, pGH234, pGH583
WXY68	S.c-25S-Noc2p-HA	a	leu2∆0 lys2-L864UAG ura3∆0 nop10-EGFP::kanMX rdnΔ,noc2Δ::NatMX, RPF2-3×Flag-HIS3,pGH225, pWX142
WXY69	C.a-25S-Noc2p-HA	a	leu2∆0 lys2-L864UAG ura3∆0 nop10-EGFP::kanMX rdnΔ,noc2Δ::NatMX, RPF2-3×Flag-HIS3,pGH229, pWX142
WXY70	C.a-25S-Noc2p K384R-HA	a	leu2∆0 lys2-L864UAG ura3∆0 nop10-EGFP::kanMX rdnΔ,noc2Δ::NatMX, RPF2-3×Flag-HIS3, pGH229, pWX143
WXY71	C.a-25S-C.a Noc2p-HA	a	leu2∆0 lys2-L864UAG ura3∆0 nop10-EGFP::kanMX rdnΔ,noc2Δ::NatMX, RPF2-3×Flag-HIS3,pGH229, pWX144
WXY72	C.a-ES7L-Noc2p-HA	a	leu2∆0 lys2-L864UAG ura3∆0 nop10-EGFP::kanMX rdnΔ,noc2Δ::NatMX, RPF2-3×Flag-HIS3,pGH234, pWX142
WXY73	C.a-ES7L-Noc2p K384R-HA	a	leu2∆0 lys2-L864UAG ura3∆0 nop10-EGFP::kanMX rdnΔ,noc2Δ::NatMX, RPF2-3×Flag-HIS3,pGH234, pWX143
WXY74	C.a-ES7L-C.a Noc2p-HA	a	leu2∆0 lys2-L864UAG ura3∆0 nop10-EGFP::kanMX rdnΔ,noc2Δ::NatMX, RPF2-3×Flag-HIS3,pGH234, pWX144

## Sheet: Table S2
Systematic Name	Name	Sequence	Description
pGH117	pGAL7-rDNA	gacgaaagggcctcgtgatacgcctatttttataggttaatgtcatgataataatggtttcttagatgatccaatatcaaaggaaatgatagcattgaaggatgagactaatccaattgaggagtggcagcatatagaacagctaaagggtagtgctgaaggaagcatacgataccccgcatggaatgggataatatcacaggaggtactagactacctttcatcctacataaatagacgcatataagtacgcatttaagcataaacacgcactatgccgttcttctcatgtatatatatatacaggcaacacgcagatataggtgcgacgtgaacagtgagctgtatgtgcgcagctcgcgttgcattttcggaagcgctcgttttcggaaacgcttt…	2μ plasmid carrying GAL7-WT rDNA LYS2 ampr
pGH208	pGAL-RPL4A	CCATTCAGGCTGCGCAACTGTTGGGAAGGGCGATCGGTGCGGGCCTCTTCGCTATTACGCCAGCTGGCGAAAGGGGGATGTGCTGCAAGGCGATTAAGTTGGGTAACGCCAGGGTTTTCCCAGTCACGACGTTGTAAAACGACGGCCAGTGAGCGCGCGTAATACGACTCACTATAGGGCGAATTGGGTACCGGGCCCCCCCtcgagctgcagaccggtactagtGGTCTCGATCCGCAGTGTCTTGGGTCTCTCTCAGAGGCGAGCGTCCCAAAACCTTCTCAAGCAAGGTTTTCAGTATAATGTTACATGCGTACACGCGTCTGTACAGAAAAAAAAGAAAAATTTGAAATATAAATAACGTTCTTAATACTAACATAACTATAAAAAAATAAATAG…	pRS416 plasmid carrying pGal-RPL4A-tCYC1 URA3 ampr
pGH225	pS.c 25S	tcgcgcgtttcggtgatgacggtgaaaacctctgacacatgcagctcccggagacggtcacagcttgtctgtaagcggatgccgggagcagacaagcccgtcagggcgcgtcagcgggtgttggcgggtgtcggggctggcttaactatgcggcatcagagcagattgtactgagagtgcaccataccacagcttttcaattcaattcatcattttttttttattcttttttttgatttcggtttctttgaaatttttttgattcggtaatctccgaacagaaggaagaacgaaggaaggagcacagacttagattggtatatatacgcatatgtagtgttgaagaaacatgaaattgcccagtattcttaacccaactgcacagaacaaaaacctgca…	2μ plasmid carrying RDN-WT rDNA URA3 ampr
pGH229	pC.a 25S	gacgaaagggcctcgtgatacgcctatttttataggttaatgtcatgataataatggtttcttagtatgatccaatatcaaaggaaatgatagcattgaaggatgagactaatccaattgaggagtggcagcatatagaacagctaaagggtagtgctgaaggaagcatacgataccccgcatggaatgggataatatcacaggaggtactagactacctttcatcctacataaatagacgcatataagtacgcatttaagcataaacacgcactatgccgttcttctcatgtatatatatatacaggcaacacgcagatataggtgcgacgtgaacagtgagctgtatgtgcgcagctcgcgttgcattttcggaagcgctcgttttcggaaacgctt…	2μ plasmid carrying RDN-C.a 25S rDNA URA3 ampr
pGH608	pC.g 25S	ggttttttgaaagtgcgtcttcagagcgcttttggttttcaaaagcgctctgaagttcctatactttctagagaataggaacttcggaataggaacttcaaagcgtttccgaaaacgagcgcttccgaaaatgcaacgcgagctgcgcacatacagctcactgttcacgtcgcacctatatctgcgtgttgcctgtatatatatatacatgagaagaacggcatagtgcgtgtttatgcttaaatgcgtacttatatgcgtctatttatgtaggatgaaaggtagtctagtacctcctgtgatattatcccattccatgcggggtatcgtatgcttccttcagcactaccctttagctgttctatatgctgccactcctcaattggattagtctcatcc…	2μ plasmid carrying RDN-C.g 25S rDNA URA3 ampr
pGH610	pK.l 25S	ggttttttgaaagtgcgtcttcagagcgcttttggttttcaaaagcgctctgaagttcctatactttctagagaataggaacttcggaataggaacttcaaagcgtttccgaaaacgagcgcttccgaaaatgcaacgcgagctgcgcacatacagctcactgttcacgtcgcacctatatctgcgtgttgcctgtatatatatatacatgagaagaacggcatagtgcgtgtttatgcttaaatgcgtacttatatgcgtctatttatgtaggatgaaaggtagtctagtacctcctgtgatattatcccattccatgcggggtatcgtatgcttccttcagcactaccctttagctgttctatatgctgccactcctcaattggattagtctcatcc…	2μ plasmid carrying RDN-K.l 25S rDNA URA3 ampr
pGH234	pC.a ES7L	gacgaaagggcctcgtgatacgcctatttttataggttaatgtcatgataataatggtttcttagtatgatccaatatcaaaggaaatgatagcattgaaggatgagactaatccaattgaggagtggcagcatatagaacagctaaagggtagtgctgaaggaagcatacgataccccgcatggaatgggataatatcacaggaggtactagactacctttcatcctacataaatagacgcatataagtacgcatttaagcataaacacgcactatgccgttcttctcatgtatatatatatacaggcaacacgcagatataggtgcgacgtgaacagtgagctgtatgtgcgcagctcgcgttgcattttcggaagcgctcgttttcggaaacgctt…	2μ plasmid carrying RDN-C.a ES7L rDNA URA3 ampr
pGH236	pC.a H2-28	gacgaaagggcctcgtgatacgcctatttttataggttaatgtcatgataataatggtttcttagtatgatccaatatcaaaggaaatgatagcattgaaggatgagactaatccaattgaggagtggcagcatatagaacagctaaagggtagtgctgaaggaagcatacgataccccgcatggaatgggataatatcacaggaggtactagactacctttcatcctacataaatagacgcatataagtacgcatttaagcataaacacgcactatgccgttcttctcatgtatatatatatacaggcaacacgcagatataggtgcgacgtgaacagtgagctgtatgtgcgcagctcgcgttgcattttcggaagcgctcgttttcggaaacgctt…	2μ plasmid carrying RDN-C.a H2-28 rDNA URA3 ampr
pGH237	pC.a H29-55	gacgaaagggcctcgtgatacgcctatttttataggttaatgtcatgataataatggtttcttagtatgatccaatatcaaaggaaatgatagcattgaaggatgagactaatccaattgaggagtggcagcatatagaacagctaaagggtagtgctgaaggaagcatacgataccccgcatggaatgggataatatcacaggaggtactagactacctttcatcctacataaatagacgcatataagtacgcatttaagcataaacacgcactatgccgttcttctcatgtatatatatatacaggcaacacgcagatataggtgcgacgtgaacagtgagctgtatgtgcgcagctcgcgttgcattttcggaagcgctcgttttcggaaacgctt…	2μ plasmid carrying RDN-C.a H29-55 rDNA URA3 ampr
pGH238	pC.a H55-101	tcgcgcgtttcggtgatgacggtgaaaacctctgacacatgcagctcccggagacggtcacagcttgtctgtaagcggatgccgggagcagacaagcccgtcagggcgcgtcagcgggtgttggcgggtgtcggggctggcttaactatgcggcatcagagcagattgtactgagagtgcaccataccacagcttttcaattcaattcatcattttttttttattcttttttttgatttcggtttctttgaaatttttttgattcggtaatctccgaacagaaggaagaacgaaggaaggagcacagacttagattggtatatatacgcatatgtagtgttgaagaaacatgaaattgcccagtattcttaacccaactgcacagaacaaaaacctgca…	2μ plasmid carrying RDN-C.a H55-101 rDNA URA3 ampr
pGH239	pC.a H29-78	gacgaaagggcctcgtgatacgcctatttttataggttaatgtcatgataataatggtttcttagtatgatccaatatcaaaggaaatgatagcattgaaggatgagactaatccaattgaggagtggcagcatatagaacagctaaagggtagtgctgaaggaagcatacgataccccgcatggaatgggataatatcacaggaggtactagactacctttcatcctacataaatagacgcatataagtacgcatttaagcataaacacgcactatgccgttcttctcatgtatatatatatacaggcaacacgcagatataggtgcgacgtgaacagtgagctgtatgtgcgcagctcgcgttgcattttcggaagcgctcgttttcggaaacgctt…	2μ plasmid carrying RDN-C.a H29-78 rDNA URA3 ampr
pGH240	pC.a H2-28&78-101	gacgaaagggcctcgtgatacgcctatttttataggttaatgtcatgataataatggtttcttagtatgatccaatatcaaaggaaatgatagcattgaaggatgagactaatccaattgaggagtggcagcatatagaacagctaaagggtagtgctgaaggaagcatacgataccccgcatggaatgggataatatcacaggaggtactagactacctttcatcctacataaatagacgcatataagtacgcatttaagcataaacacgcactatgccgttcttctcatgtatatatatatacaggcaacacgcagatataggtgcgacgtgaacagtgagctgtatgtgcgcagctcgcgttgcattttcggaagcgctcgttttcggaaacgctt…	2μ plasmid carrying RDN-C.a H2-28 plus 78-101 rDNA URA3 ampr
pGH241	pC.a H2-24	gacgaaagggcctcgtgatacgcctatttttataggttaatgtcatgataataatggtttcttagtatgatccaatatcaaaggaaatgatagcattgaaggatgagactaatccaattgaggagtggcagcatatagaacagctaaagggtagtgctgaaggaagcatacgataccccgcatggaatgggataatatcacaggaggtactagactacctttcatcctacataaatagacgcatataagtacgcatttaagcataaacacgcactatgccgttcttctcatgtatatatatatacaggcaacacgcagatataggtgcgacgtgaacagtgagctgtatgtgcgcagctcgcgttgcattttcggaagcgctcgttttcggaaacgctt…	2μ plasmid carrying RDN-C.a H2-24 rDNA URA3 ampr
pGH528	pGAP-Noc2 K384R	GATCGCTTGCCTGTAACTTACACGCGCCTCGTATCTTTTAATGATGGAATAATTTGGGAATTTACTCTGTGTTTATTTATTTTTATGTTTTGTATTTGGATTTTAGAAAGTAAATAAAGAAGGTAGAAGAGTTACGGAATGAAGAAAAAAAAATAAACAAAGGTTTAAAAAATTTCAACAAAAAGCGTACTTTACATATATATTTATTAGACAAGAAAAGCAGATTAAATAGATATACATTCGATTAACGATAAGTAAAATGTAAAATCACAGGATTTTCGTGTGTGGTCTTCTACACAGACAAGATGAAACAATTCGGCATTAATACCTGAGAGCAGGAAGAGCAAGATAAAAGGTAGTATTTGTTGGCGATCCCCCTAGAGTCTTTTACATCTTCGG…	pRS415 plasmid carrying pGap-Noc2 K384R-tCYC1 LEU2 ampr
pGH583	pGAP-C.a Noc2	GATCGCTTGCCTGTAACTTACACGCGCCTCGTATCTTTTAATGATGGAATAATTTGGGAATTTACTCTGTGTTTATTTATTTTTATGTTTTGTATTTGGATTTTAGAAAGTAAATAAAGAAGGTAGAAGAGTTACGGAATGAAGAAAAAAAAATAAACAAAGGTTTAAAAAATTTCAACAAAAAGCGTACTTTACATATATATTTATTAGACAAGAAAAGCAGATTAAATAGATATACATTCGATTAACGATAAGTAAAATGTAAAATCACAGGATTTTCGTGTGTGGTCTTCTACACAGACAAGATGAAACAATTCGGCATTAATACCTGAGAGCAGGAAGAGCAAGATAAAAGGTAGTATTTGTTGGCGATCCCCCTAGAGTCTTTTACATCTTCGG…	pRS415 plasmid carrying pGap-C.a Noc2-tCYC1 LEU2 ampr
pGH587	pGAP-Noc2	GATCGCTTGCCTGTAACTTACACGCGCCTCGTATCTTTTAATGATGGAATAATTTGGGAATTTACTCTGTGTTTATTTATTTTTATGTTTTGTATTTGGATTTTAGAAAGTAAATAAAGAAGGTAGAAGAGTTACGGAATGAAGAAAAAAAAATAAACAAAGGTTTAAAAAATTTCAACAAAAAGCGTACTTTACATATATATTTATTAGACAAGAAAAGCAGATTAAATAGATATACATTCGATTAACGATAAGTAAAATGTAAAATCACAGGATTTTCGTGTGTGGTCTTCTACACAGACAAGATGAAACAATTCGGCATTAATACCTGAGAGCAGGAAGAGCAAGATAAAAGGTAGTATTTGTTGGCGATCCCCCTAGAGTCTTTTACATCTTCGG…	pRS415 plasmid carrying pGap-WT Noc2-tCYC1 LEU2 ampr
pWX142	pGAP-Noc2-HA	GACGAAAGGGCCTCGTGATACGCCTATTTTTATAGGTTAATGTCATGATAATAATGGTTTCTTAGGACGGATCGCTTGCCTGTAACTTACACGCGCCTCGTATCTTTTAATGATGGAATAATTTGGGAATTTACTCTGTGTTTATTTATTTTTATGTTTTGTATTTGGATTTTAGAAAGTAAATAAAGAAGGTAGAAGAGTTACGGAATGAAGAAAAAAAAATAAACAAAGGTTTAAAAAATTTCAACAAAAAGCGTACTTTACATATATATTTATTAGACAAGAAAAGCAGATTAAATAGATATACATTCGATTAACGATAAGTAAAATGTAAAATCACAGGATTTTCGTGTGTGGTCTTCTACACAGACAAGATGAAACAATTCGGCATTAATACCT…	pRS415 plasmid carrying pGap-WT Noc2-6×HA-tCYC1 LEU2 ampr
pWX143	pGAP-Noc2 K384R-HA	GACGAAAGGGCCTCGTGATACGCCTATTTTTATAGGTTAATGTCATGATAATAATGGTTTCTTAGGACGGATCGCTTGCCTGTAACTTACACGCGCCTCGTATCTTTTAATGATGGAATAATTTGGGAATTTACTCTGTGTTTATTTATTTTTATGTTTTGTATTTGGATTTTAGAAAGTAAATAAAGAAGGTAGAAGAGTTACGGAATGAAGAAAAAAAAATAAACAAAGGTTTAAAAAATTTCAACAAAAAGCGTACTTTACATATATATTTATTAGACAAGAAAAGCAGATTAAATAGATATACATTCGATTAACGATAAGTAAAATGTAAAATCACAGGATTTTCGTGTGTGGTCTTCTACACAGACAAGATGAAACAATTCGGCATTAATACCT…	pRS415 plasmid carrying pGap-Noc2 K384R-6×HA-tCYC1 LEU2 ampr
pWX144	pGAP-C.a Noc2-HA	GACGAAAGGGCCTCGTGATACGCCTATTTTTATAGGTTAATGTCATGATAATAATGGTTTCTTAGGACGGATCGCTTGCCTGTAACTTACACGCGCCTCGTATCTTTTAATGATGGAATAATTTGGGAATTTACTCTGTGTTTATTTATTTTTATGTTTTGTATTTGGATTTTAGAAAGTAAATAAAGAAGGTAGAAGAGTTACGGAATGAAGAAAAAAAAATAAACAAAGGTTTAAAAAATTTCAACAAAAAGCGTACTTTACATATATATTTATTAGACAAGAAAAGCAGATTAAATAGATATACATTCGATTAACGATAAGTAAAATGTAAAATCACAGGATTTTCGTGTGTGGTCTTCTACACAGACAAGATGAAACAATTCGGCATTAATACCT…	pRS415 plasmid carrying pGap-C.a Noc2-6×HA-tCYC1 LEU2 ampr
pWX256	pET28a-Noc2-His6	GATGGTGTCCGGGATCTCGACGCTCTCCCTTATGCGACTCCTGCATTAGGAAGCAGCCCAGTAGTAGGTTGAGGCCGTTGAGCACCGCCGCCGCAAGGAATGGTGCATGCAAGGAGATGGCGCCCAACAGTCCCCCGGCCACGGGGCCTGCCACCATACCCACGCCGAAACAAGCGCTCATGAGCCCGAAGTGGCGAGCCCGATCTTCCCCATCGGTGATGTCGGCGATATAGGCGCCAGCAACCGCACCTGTGGCGCCGGTGATGCCGGCCACGATGCGTCCGGCGTAGAGGATCGAGATCTCGATCCCGCGAAATTAATACGACTCACTATAGGGGAATTGTGAGCGGATAACAATTCCCCTCTAGAAATAATTTTGTTTAACTTTAAGAAGGAGAT…	pET28a plasmid carrying Noc2-His6 kanr
pWX257	pET28a-Erb1-HA	GATGGTGTCCGGGATCTCGACGCTCTCCCTTATGCGACTCCTGCATTAGGAAGCAGCCCAGTAGTAGGTTGAGGCCGTTGAGCACCGCCGCCGCAAGGAATGGTGCATGCAAGGAGACCTGCAGGTGGCGCCCAACTAGTCTGCCACCATACCCACGCCGAAACAAGCGCTCATGAGCCCGAAGTGGCGAGCCCGATCTTCCCCATCGGTGATGTCGGCGATATAGGCGCCAGCAACCGCACCTGTGGCGCCGGTGATGCCGGCCACGATGCGTCCGGCGTAGAGGATCGAGATCTCGATCCCGCGAAATTAATACGACTCACTATAGGGGAATTGTGAGCGGATAACAATTCCCCTCTAGAAATAATTTTGTTTAACTTTAAGAAGGAGATATACCAT…	pET28a plasmid carrying Erb1-3×HA kanr
pWX258	pET28a-Erb1-HA-Noc2-His6	GTAGTAGGTTGAGGCCGTTGAGCACCGCCGCCGCAAGGAATGGTGCATGCAAGGAGACCTGCAGGTAGAGGATCGAGATCTCGATCCCGCGAAATTAATACGACTCACTATAGGGGAATTGTGAGCGGATAACAATTCCCCTCTAGAAATAATTTTGTTTAACTTTAAGAAGGAGATATACCATGGATGGGTAAAGTTTCTAAATCGACCAAGAAGTTTCAATCGAAGCATTTGAAGCATACTCTAGACCAAAGAAGAAAGGAAAAGATCCAAAAGAAGAGAATCCAAGGCCGTCGTGGCAACAAAACTGATCAGGAAAAGGCCGATGCTGCTGGTACTAGGGAACAACAGCAGTTGAAAAAATCTGCAAAGGAAGAGGTTTTTAAGGACATGTCTGTC…	pET28a plasmid carrying Erb1-3×HA and Noc2-His6 kanr
pZY1	pGAL-Nop15	CGAATGGCGCGACGCGCCCTGTAGCGGCGCATTAAGCGCGGCGGGTGTGGTGGTTACGCGCAGCGTGACCGCTACACTTGCCAGCGCCCTAGCGCCCGCTCCTTTCGCTTTCTTCCCTTCCTTTCTCGCCACGTTCGCCGGCTTTCCCCGTCAAGCTCTAAATCGGGGGCTCCCTTTAGGGTTCCGATTTAGTGCTTTACGGCACCTCGACCCCAAAAAACTTGATTAGGGTGATGGTTCACGTAGTGGGCCATCGCCCTGATAGACGGTTTTTCGCCCTTTGACGTTGGAGTCCACGTTCTTTAATAGTGGACTCTTGTTCCAAACTGGAACAACACTCAACCCTATCTCGGTCTATTCTTTTGATTTATAAGGGATTTTGCCGATTTCGGCCTATTG…	pRS416 plasmid carrying pGal-Nop15-tCYC1 URA3 ampr
pZY2	pGAL-Rcl1	CGAATGGCGCGACGCGCCCTGTAGCGGCGCATTAAGCGCGGCGGGTGTGGTGGTTACGCGCAGCGTGACCGCTACACTTGCCAGCGCCCTAGCGCCCGCTCCTTTCGCTTTCTTCCCTTCCTTTCTCGCCACGTTCGCCGGCTTTCCCCGTCAAGCTCTAAATCGGGGGCTCCCTTTAGGGTTCCGATTTAGTGCTTTACGGCACCTCGACCCCAAAAAACTTGATTAGGGTGATGGTTCACGTAGTGGGCCATCGCCCTGATAGACGGTTTTTCGCCCTTTGACGTTGGAGTCCACGTTCTTTAATAGTGGACTCTTGTTCCAAACTGGAACAACACTCAACCCTATCTCGGTCTATTCTTTTGATTTATAAGGGATTTTGCCGATTTCGGCCTATTG…	pRS416 plasmid carrying pGal-Rcl1-tCYC1 URA3 ampr
pZY3	pGAL-Rat1	CGAATGGCGCGACGCGCCCTGTAGCGGCGCATTAAGCGCGGCGGGTGTGGTGGTTACGCGCAGCGTGACCGCTACACTTGCCAGCGCCCTAGCGCCCGCTCCTTTCGCTTTCTTCCCTTCCTTTCTCGCCACGTTCGCCGGCTTTCCCCGTCAAGCTCTAAATCGGGGGCTCCCTTTAGGGTTCCGATTTAGTGCTTTACGGCACCTCGACCCCAAAAAACTTGATTAGGGTGATGGTTCACGTAGTGGGCCATCGCCCTGATAGACGGTTTTTCGCCCTTTGACGTTGGAGTCCACGTTCTTTAATAGTGGACTCTTGTTCCAAACTGGAACAACACTCAACCCTATCTCGGTCTATTCTTTTGATTTATAAGGGATTTTGCCGATTTCGGCCTATTG…	pRS416 plasmid carrying pGal-Rat1-tCYC1 URA3 ampr

## Sheet: Table S3
Systematic Name	Sequence 5'-3'			Description
ZYO130	GGGAGTTTTATCCAGCGTCAGC			Q-PCR analysis for Scr1
ZYO131	GCCGAAGCGATCAACTTGCAC
ZYO250-1	ACTGGCAGGATCAACCAGATAACA			Q-PCR analysis for pre-rRNA intermediates			Mixture of ZYO251, ZYO252-1 and ZYO131 for reverse transcription
ZYO251	GCCTTGTTGTTACGATCTGCTGAG						ZYO250-1 and ZYO251 for 32S Q-PCR analysis
ZYO252-1	CTCCAAAGAGTATCACTCACTAC						ZYO251 and ZYO262-9 for 27SA2 Q-PCR analysis
ZYO252-2S	AGATCCGTTGTTGAAAGTTTACAAAT						ZYO251 and ZYO263-1 for 27SA3 Q-PCR analysis
ZYO252-2L	CCGTTGTTGAAAGTTTTTAATAACAAAT						ZYO251 and ZYO252-2S for 27SBS Q-PCR analysis
ZYO256-4S	GCAAGTACGGTCGTTTTAAAAC						ZYO251 and ZYO252-2L for 27SBL Q-PCR analysis
ZYO256-5L	GCAAGTACGGTCGTTTTATATTA						ZYO252-1 and ZYO256-4S for 7SS Q-PCR analysis
ZYO262-9	AAGATATGAAAACTCCACAGTGTACAAATC						ZYO252-1 and ZYO256-5L for 7SL Q-PCR analysis
ZYO263-1	GACAAAAATTTAATGAATAGATAAAATTGTACAAATC
